# Supplementary material for: Patient-derived organoids as a platform for modeling a patient’s response to chemoradiotherapy in esophageal cancer
Source: PubMed Central journal article supplement (PMC8556341; doi:10.1038/s41598-021-00706-8), 2021-10-29
Supplement: 41598_2021_706_MOESM1_ESM.pdf [file 41598_2021_706_MOESM1_ESM.pdf]

## Supplemental figures

### Supplementary Figure 1

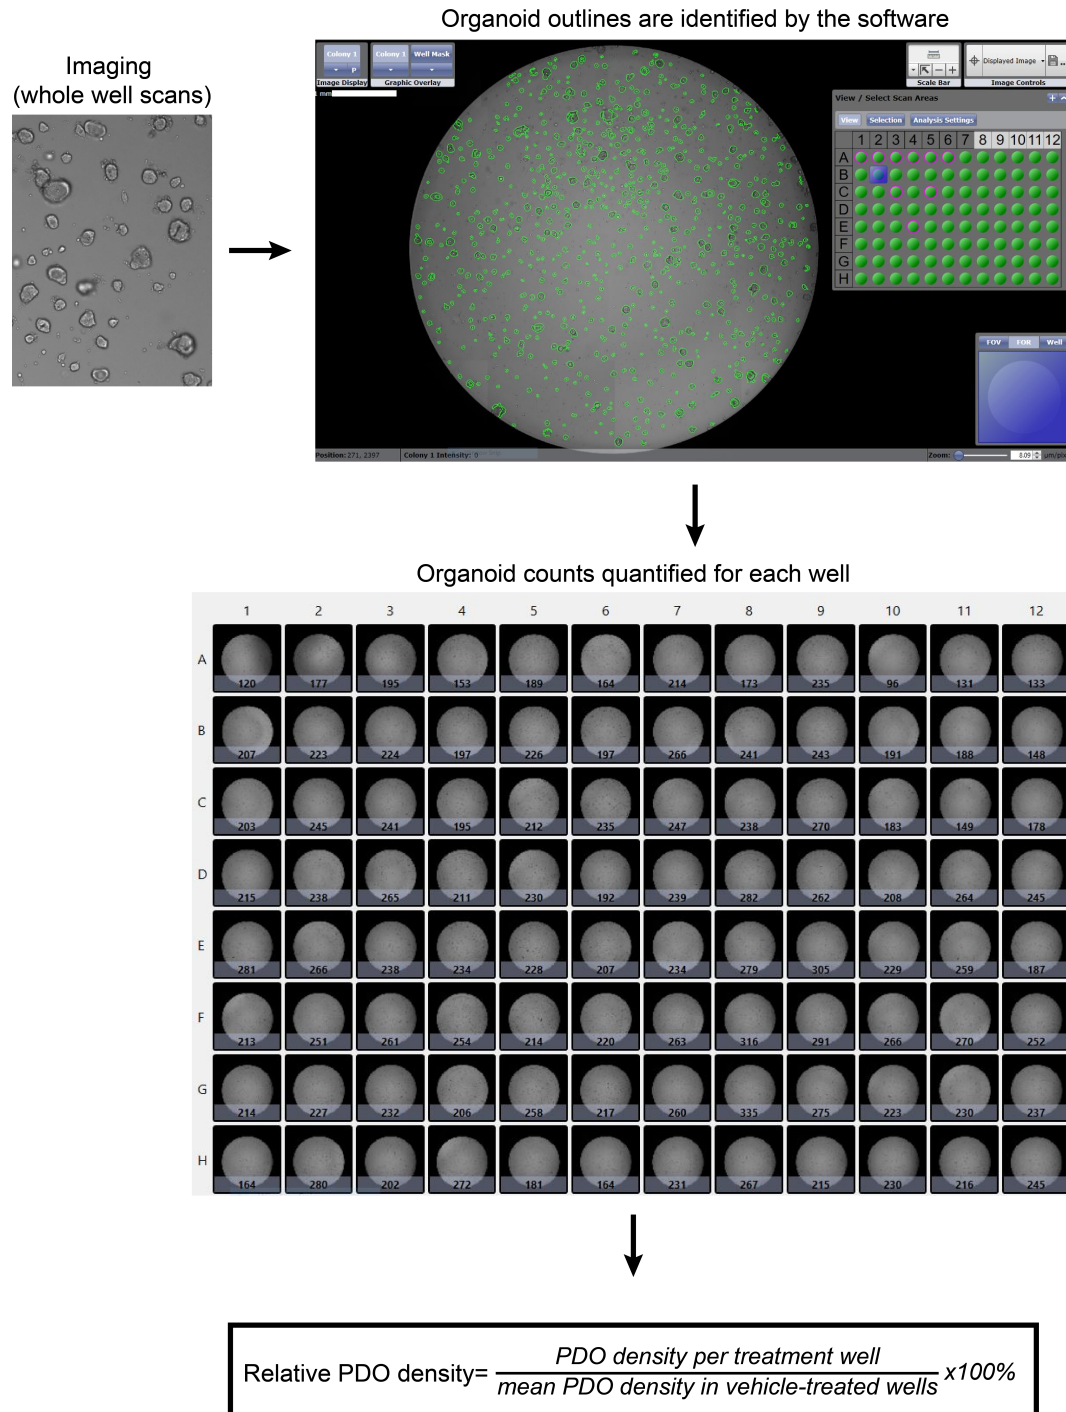

**Supplementary Figure 1:** Schematic of PDO density quantification using Celigo Image Cytometer Software.

Supplementary Figure 2

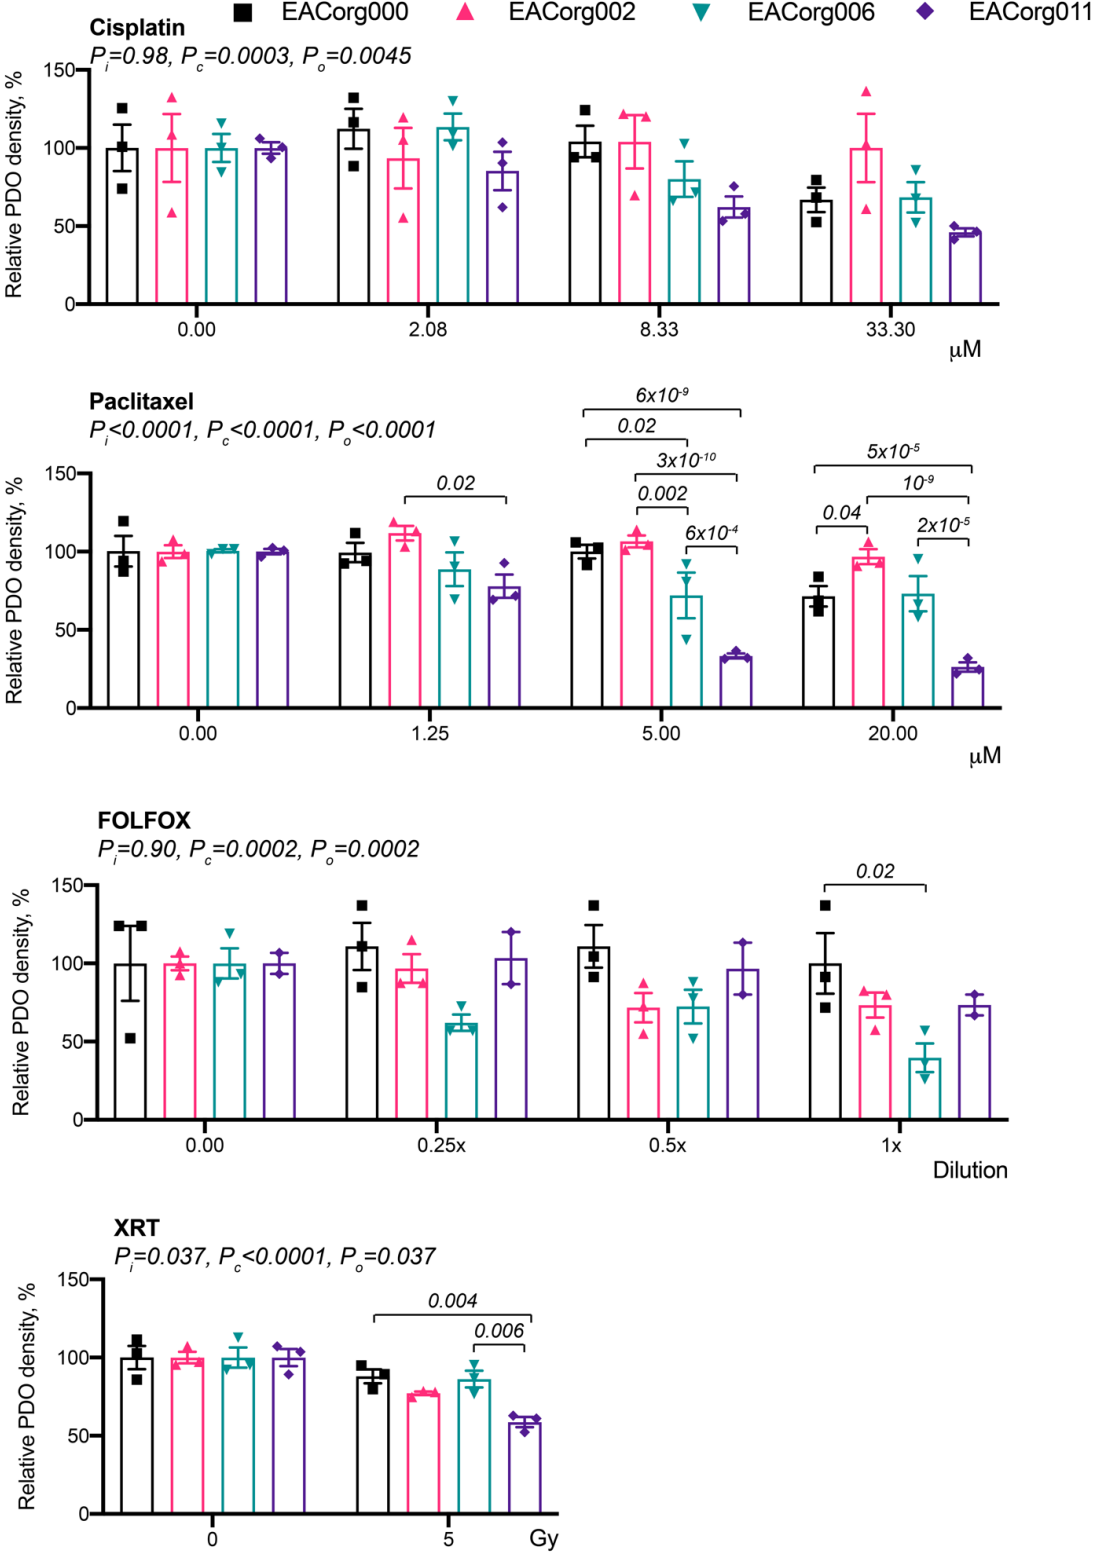

**Supplementary Figure 2: EAC PDOs serve as avatars for patients' responses to therapy.** Relative PDO density in response to components of standard of care and alternative treatment. 2-way ANOVA parameters:  $P_i$ =significance of interaction (differential response of organoid lines),  $P_c$ =significance of concentration/dose,  $P_o$ =significance of organoid line. Error bars = SEM, significant P-values for multiple comparisons are listed on the graphs.

Supplementary Figure 3

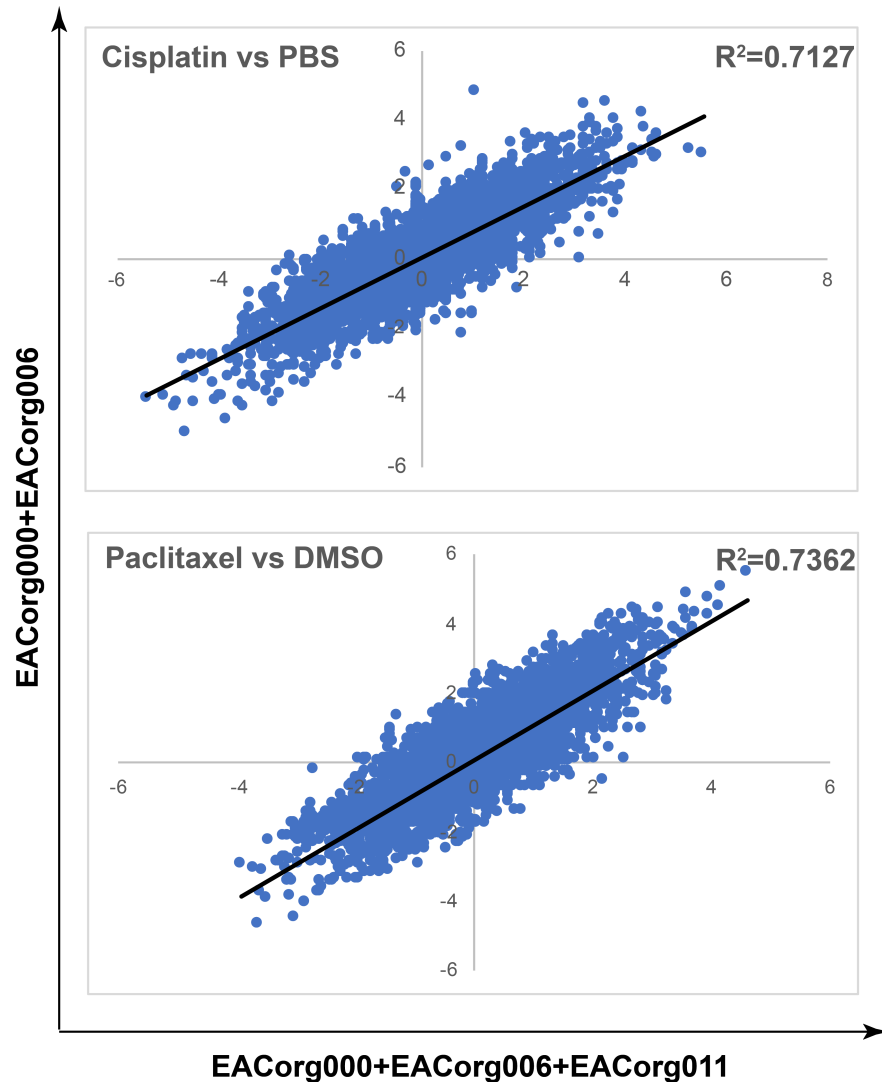

**Supplementary Figure 3: Introduction of EACorg011 does not substantially alter the DEG lists.** DEG lists obtained by analyzing datasets comprised by EACorg000+EACorg006+EACorg001 were plotted against the DEG lists obtained by analyzing the EACorg000+EACorg006 datasets.  $R^2$  values for linear relationship displayed on the graphs.

Supplementary Figure 4

■ EACorg000 ▲ EACorg002 ▼ EACorg006 ◆ EACorg011

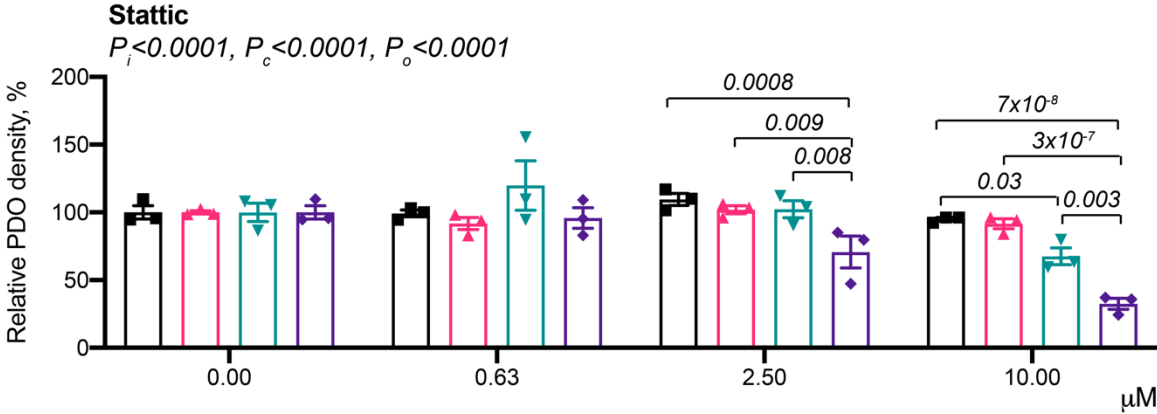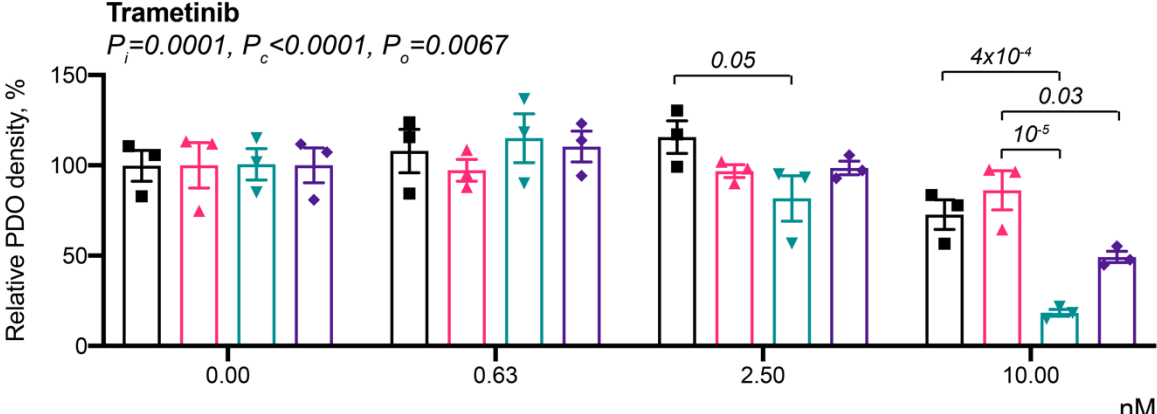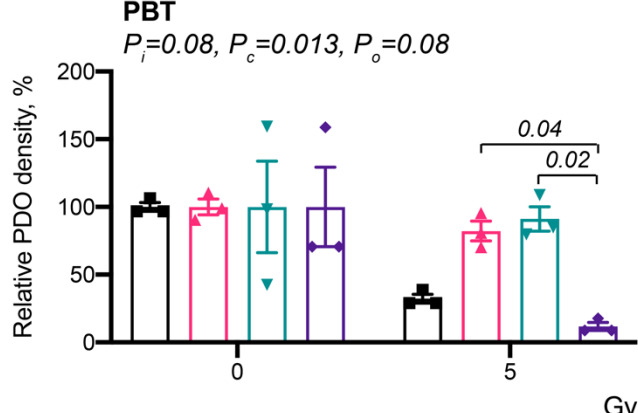

**Supplementary Figure 4: EAC PDOs respond differentially to experimental therapeutics.** Relative PDO density in response to components of standard of care and alternative treatment. 2-way ANOVA parameters:  $P_i$ =significance of interaction (differential response of organoid lines),  $P_c$ =significance of concentration/dose,  $P_o$ =significance of organoid line. Error bars = SEM, significant P-values for multiple comparisons are listed on the graphs.
